# Supplementary material for: Sofosbuvir-Upregulated Genes Facilitate The Development of Hepatocellular Carcinoma
Source: Research Square preprint supplement (doi:10.21203/rs.3.rs-130882/v1), 2020-12-22
Supplement: Supplementary file 1 [file ee3b646606d607932f34584f.docx]

**Table S1. Genes up-regulated by sofosbuvir in OR-6 cells**

| Gene name | Ensembl Transcript ID | Gene type | Fold change | P-value |
| --- | --- | --- | --- | --- |
| SMN2(survival of mototor neuron 2) | ENST00000380743.8 | Protein coding | 4181 | <0.05 |
| *NPHP3*-*ACAD11* | ENST00000632629.1 | Protein coding | 156 | <0.05 |
| UBE2F-SCLY | ENST00000449891.5 | Nonsense  mediated decay | 148 | <0.05 |
| RALGAPAIP | NR_104269.1.1 | Pseudogene | 136 | <0.05 |
| WRB-SH3BGR | NM_001317744.1.1 | Protein coding | 106 | <0.05 |
| TRIM39-RPP21 | ENST00000623385.3 | Protein coding | 91 | <0.05 |
| HOXA10-HOXA9 | NR_037940.1.1 | Misc RNA | 82 | <0.05 |
| TMEM189-UBE2V1 | ENST00000341698.2 | Protein coding | 66 | <0.05 |
| GOLGA6L17P | ENST00000611297.4 | Pseudogene | 62 | <0.05 |
| JMJD7-PLA2G4B | ENST00000382448.8 | Protein coding | 46 | <0.05 |
| CLEC18B | ENST00000339953.9 | Protein coding | 37 | <0.05 |
| SNORD141A | NR_132980.1.1 | snoRNA | 36 | <0.05 |
| SNORD141B | NR_132981.1.1 | snoRNA | 36 | <0.05 |
| PHOSPHO2-KLHK23 | NM_001199290.1.1 | Protein coding | 17 | <0.05 |
| CTAGE9 | ENST00000314099.9 | Protein coding | 13 | <0.05 |
| TGIF2-C20orf24 | ENST00000558530.1 | Protein coding | 7 | <0.05 |
| ATP5J2-PTCD1 | ENST00000413834.5 | Protein coding | 5 | <0.05 |
| NBL1 | ENST00000375136.7 | Protein coding | 4 | <0.05 |
| RNASEK-C17orf49 | ENST00000547302.3 | Protein coding | 3 | <0.05 |
| TSNAX-DISC1 | ENSG00000270106 | Protein coding | 3 | <0.05 |
| C8orf44-SGK3 | ENST00000519289.1 | Protein coding | 2 | <0.05 |
| POC1B-GALNT4 | ENST00000548729.5 | Protein coding | 2 | <0.05 |
| ACOT1 | ENST00000311148.8 | Protein coding | 2 | <0.05 |
| SERF2-C15ORF63 | NR_037673.1.1 | Misc RNA | 2 | <0.05 |
| RPS10-NUDT3 | ENST00000639725.1 | Protein coding | 2 | <0.05 |
